# Supplementary material for: Autonomic and Neural Activity Dynamically Couple During Infant Attention
Source: Research Square preprint supplement (doi:10.21203/rs.3.rs-7143406/v1), 2025-10-20
Supplement: Supplementary file 1 [file b8ef3ea89a5f5b7836e8a9f8.docx]

SUPPLEMENTAL INFORMATION

**Supplemental Table 1. Time-to-attention dynamics of RSA, EEG power, and RSA–EEG coupling.**

|  | ***RSA*** | ***Theta*** | ***Alpha*** |
| --- | --- | --- | --- |
| **Fixed Effect Terms** | **Est (Std. Error)** | **Est (Std. Error)** | **Est (Std. Error)** |
| (Intercept) | 5.13 [5.04 – 5.22]*** | –0.56 [–0.65 – –0.46] *** | –0.59 [–0.68 – –0.50] *** |
| **Phase** |  |  |  |
| Orienting | 0.22 [0.21 – 0.24]*** | 0.04 [0.03 – 0.05] *** | 0.04 [0.03 – 0.05] *** |
| Sustained Attention | 0.22 [0.20 – 0.24] *** | 0.05 [0.04 – 0.06]*** | 0.05 [0.04 – 0.06] *** |
| Termination | 0.01 [–0.01 – 0.03] | –0.01 [–0.02 – 0.00] | –0.01 [–0.01 – 0.00] |
| **RSA X EEG** |  |  |  |
| Orienting |  | 0.02 [0.00 – 0.04] * | 0.04 [0.02 – 0.06] *** |
| Sustained Attention |  | –0.02 [–0.04 – –0.01] ** | 0.01 [–0.00 – 0.03] |
| Termination |  | 0.01 [–0.01 – 0.03] | 0.02 [–0.00 – 0.03] |
